1

Article (Discoveries)

## 2 ***R2d2* drives selfish sweeps in the house mouse**

3 John P Didion<sup>1,2,3\*</sup>, Andrew P Morgan<sup>1,2,3\*</sup>, Liran Yadgary<sup>1,2,3</sup>, Timothy A Bell<sup>1,2,3</sup>,  
 4 Rachel C McMullan<sup>1,2,3</sup>, Lydia Ortiz de Solorzano<sup>1,2,3</sup>, Janice Britton-Davidian<sup>4</sup>,  
 5 Carol J Bult<sup>5</sup>, Karl J Campbell<sup>6,7</sup>, Riccardo Castiglia<sup>8</sup>, Yung-Hao Ching<sup>9</sup>, Amanda  
 6 J Chunco<sup>10</sup>, James J Crowley<sup>1</sup>, Elissa J Chesler<sup>5</sup>, John E French<sup>11</sup>, Sofia I  
 7 Gabriel<sup>12</sup>, Daniel M Gatti<sup>5</sup>, Theodore Garland Jr.<sup>13</sup>, Eva B Giagia-  
 8 Athanasopoulou<sup>14</sup>, Mabel D Giménez<sup>15</sup>, Sofia A Grize<sup>16</sup>, İslam Gündüz<sup>17</sup>, Andrew  
 9 Holmes<sup>18</sup>, Heidi C Hauffe<sup>19</sup>, Jeremy S Herman<sup>20</sup>, James M Holt<sup>21</sup>, Kunjie Hua<sup>1</sup>,  
 10 Wesley J Jolley<sup>22</sup>, Anna K Lindholm<sup>16</sup>, María J López-Fuster<sup>23</sup>, George  
 11 Mitsainas<sup>14</sup>, Maria da Luz Mathias<sup>12</sup>, Leonard McMillan<sup>21</sup>, M Graça  
 12 Ramalhinho<sup>23</sup>, Barbara Rehmann<sup>24</sup>, Stephan P Rosshart<sup>24</sup>, Jeremy B Searle<sup>25</sup>,  
 13 Meng-Shin Shiao<sup>26</sup>, Emanuela Solano<sup>8</sup>, Karen L Svenson<sup>5</sup>, Pat Thomas-  
 14 Laemont<sup>10</sup>, David W Threadgill<sup>27</sup>, Jacint Ventura<sup>28</sup>, George M Weinstock<sup>29</sup>,  
 15 Daniel Pomp<sup>1,3</sup>, Gary A Churchill<sup>5</sup>, Fernando Pardo-Manuel de Villena<sup>1,2,3</sup>

16 1. Department of Genetics, University of North Carolina at Chapel Hill, Chapel  
 17 Hill, NC, US

18 2. Lineberger Comprehensive Cancer Center, University of North Carolina at  
 19 Chapel Hill, Chapel Hill, NC, US

20 3. Carolina Center for Genome Science, University of North Carolina at Chapel  
 21 Hill, Chapel Hill, NC, US

22 4. Institut des Sciences de l'Evolution, Université de Montpellier, CNRS, IRD,  
 23 EPHE, Montpellier, FR

24 5. The Jackson Laboratory, Bar Harbor, ME, US

25 6. Island Conservation, Puerto Ayora, Galápagos Island, EC

26 7. School of Geography, Planning & Environmental Management, The University  
 27 of Queensland, St Lucia, AU

8. Department of Biology and Biotechnologies "Charles Darwin", University of Rome "La Sapienza", Rome, IT
9. Department of Molecular Biology and Human Genetics, Tzu Chi University, Hualien, TW
10. Department of Environmental Studies, Elon University, Elon, NC, US
11. National Toxicology Program, National Institute of Environmental Sciences, NIH, Research Triangle Park, NC, US
12. Department of Animal Biology & CESAM - Centre for Environmental and Marine Studies, Faculty of Sciences, University of Lisbon, Lisboa, PT
13. Department of Biology, University of California Riverside, Riverside, CA, US
14. Section of Animal Biology, Department of Biology, University of Patras, Patras, GR
15. Instituto de Biología Subtropical, CONICET - Universidad Nacional de Misiones, Posadas, MS, AR
16. Institute of Evolutionary Biology and Environmental Studies, University of Zurich, Zurich, CH
17. Department of Biology, Faculty of Arts and Sciences, University of Ondokuz Mayis, Samsun, TU
18. Laboratory of Behavioral and Genomic Neuroscience, National Institute on Alcohol Abuse and Alcoholism, NIH, Bethesda, MD, US
19. Department of Biodiversity and Molecular Ecology, Research and Innovation Centre, Fondazione Edmund Mach, S. Michele all'Adige, TN, IT
20. Department of Natural Sciences, National Museums Scotland, Edinburgh, UK
21. Department of Computer Science, University of North Carolina at Chapel Hill, Chapel Hill, NC, US
22. Island Conservation, Santa Cruz, CA, US

23. Faculty of Biology, Universitat de Barcelona, Avinguda Diagonal 643, 08028  
Barcelona, ES

24. Immunology Section, Liver Diseases Branch, National Institute of Diabetes  
and Digestive and Kidney Diseases, NIH, Bethesda, MD, US

25. Department of Ecology and Evolutionary Biology, Cornell University, Ithaca,  
NY, US

26. Research Center, Faculty of Medicine, Ramathibodi Hospital, Mahidol  
University, 10400, Bangkok, TH

27. Department of Veterinary Pathobiology and Department of Molecular and  
Cellular Medicine, Texas A&M University, College Station, TX, US

28. Departament de Biologia Animal, de Biologia Vegetal i d'Ecologia, Facultat  
de Biociències, Universitat Autònoma de Barcelona, Barcelona, ES

29. Jackson Laboratory for Genomic Medicine, Farmington, CT, US

\* These authors contributed equally to this work

Corresponding author: Fernando Pardo-Manuel de Villena,  
fernando@med.unc.edu

## Abstract

A selective sweep is the result of strong positive selection driving newly occurring or standing genetic variants to fixation, and can dramatically alter the pattern and distribution of allelic diversity in a population. Population-level sequencing data have enabled discoveries of selective sweeps associated with genes involved in recent adaptations in many species. In contrast, much debate but little empirical evidence addresses whether “selfish” genes are capable of fixation – thereby leaving signatures identical to classical selective sweeps – despite being neutral or deleterious to organismal fitness. We previously described *R2d2*, a large copy-number variant that causes non-random segregation of mouse Chromosome 2 in females due to meiotic drive. Here we show population-genetic data consistent with a selfish sweep driven by alleles of *R2d2* with high copy number (*R2d2<sup>HC</sup>*) in natural populations. We replicate this finding in multiple closed breeding populations from six outbred backgrounds segregating for *R2d2* alleles. We find that *R2d2<sup>HC</sup>* rapidly increases in frequency, and in most cases becomes fixed in significantly fewer generations than can be explained by genetic drift. *R2d2<sup>HC</sup>* is also associated with significantly reduced litter sizes in heterozygous mothers, making it a true selfish allele. Our data provide direct evidence of populations actively undergoing selfish sweeps, and demonstrate that meiotic drive can rapidly alter the genomic landscape in favor of mutations with neutral or even negative effects on overall Darwinian fitness. Further study will reveal the incidence of selfish sweeps, and will elucidate the relative contributions of selfish genes, adaptation and genetic drift to evolution.

## Introduction

Population-level sequencing data have enabled analyses of positive selection in many species, including mice (Staubach et al. 2012) and humans (Williamson et al. 2007; Grossman et al. 2013; Colonna et al. 2014). These studies seek to identify genetic elements, such as single nucleotide variants (SNVs) and copy number variants (CNVs), that are associated with phenotypic differences

between populations that share a common origin (Fu and Akey 2013; Bryk and Tautz 2014). A marked difference in local genetic diversity between closely related taxa might indicate that one lineage has undergone a sweep, in which a variant under strong positive selection rises in frequency and carries with it linked genetic variation (“genetic hitch-hiking”), thereby reducing local haplotype diversity (Maynard Smith and Haigh 1974; Kaplan et al. 1989). In genomic scans for sweeps, it is typically assumed that the driving allele will have a strong positive effect on organismal fitness. Prominent examples of sweeps for which this assumption holds true (*i.e.* classic selective sweeps) include alleles at the *Vkorc1* locus, which confers rodenticide resistance in the brown rat (Pelz et al. 2005), and enhancer polymorphisms conferring lactase persistence in human beings (Bersaglieri et al. 2004). However, we and others have suggested that selfish alleles that strongly promote their own transmission irrespective of their effects on overall fitness could give rise to genomic signatures indistinguishable from those of classic selective sweeps (Sandler and Novitski 1957; White 1978; Henikoff and Malik 2002; Derome et al. 2004; Pardo-Manuel de Villena 2004; Brandvain and Coop 2011).

Suggestive evidence that sweeps may be driven by selfish alleles comes from studies in *Drosophila*. Incomplete sweeps have been identified at the *Segregation Distorter* (SD) locus (Presgraves et al. 2009) and in at least three X-chromosome systems (Babcock and Anderson 1996; Dyer et al. 2007; Derome et al. 2008; Kingan et al. 2010), all of which drive through the male germline. In addition, genomic conflict has been proposed as a possible driver of two nearly complete sweeps in *D. mauritiana* (Nolte et al. 2013). Incomplete sweeps were also detected in natural populations of *Mimulus* (monkeyflower), and the cause was identified as female meiotic drive of the centromeric *D* locus (Fishman and Saunders 2008). That all evidence of selfish sweeps derives from two genera is to some extent reflective of a selection bias, but may also indicate a difference in the incidence or effect of selfish alleles between these taxa and equally well-studied mammalian species (*e.g.* humans and mice). Furthermore, the lack of completed selfish sweeps reported in the literature may be due to an unexpected

strength of balancing selection, in which the deleterious effects of selfish alleles prevent them from driving to fixation, or due to insufficient methods of detection.

Here, we investigate whether a selfish allele can sweep in natural and laboratory populations of the house mouse, *M. m. domesticus*. We recently described *R2d2*, a meiotic drive responder locus on mouse Chromosome 2 (Didion et al. 2015). *R2d2* is a variably sized copy number gain of a 127 kb core element that contains a single annotated gene, *Cwc22* (a spliceosomal protein). In females heterozygous for *R2d2*, transmission of an allele with high copy number (*R2d2<sup>HC</sup>*) relative to an allele with low copy number (*R2d2<sup>LC</sup>*) is a quantitative trait controlled by multiple unlinked modifier loci. We define “high copy number” as the minimum copy number with evidence of distorted transmission in existing experiments – approximately 7 units of the core element. Distorted transmission is present in some laboratory crosses (Siracusa et al. 1991; Montagutelli et al. 1996; Swallow et al. 1998; Eversley et al. 2010; Kelly et al. 2010a) segregating for *R2d2<sup>HC</sup>* alleles, but absent in others (Didion et al. 2015). *R2d2<sup>HC</sup>* genotype is also either uncorrelated or negatively correlated with litter size – a major component of absolute fitness – depending on the presence of meiotic drive. *R2d2<sup>HC</sup>* therefore behaves as a selfish genetic element. In the current study, we provide evidence of a recent sweep at *R2d2<sup>HC</sup>* in wild *M. m. domesticus* mice, and we show that *R2d2<sup>HC</sup>* has repeatedly driven selfish sweeps in closed-breeding mouse populations.

## Results and Discussion

### *Evidence for a selfish sweep in wild mouse populations*

A recent study (Pezer et al. 2015) showed extreme copy number variation at *Cwc22* in a sample of 26 wild mice (*M. m. domesticus*). To determine whether this was indicative of *R2d2* copy number variation in the wild, we assayed an additional 396 individuals sampled from 14 European countries and the United States (**Supplementary Table 1** and **Figure 1**). We found that *R2d2<sup>HC</sup>* alleles

are segregating at a wide range of frequencies in natural populations (0.00 – 0.67; **Table 1**).

To test for a selfish sweep at  $R2d2^{HC}$ , we genotyped the wild-caught mice on the MegaMUGA array (Rogala et al. 2014; Morgan and Welsh 2015; Morgan et al. 2015) and examined patterns of haplotype diversity. In the case of strong positive selection, unrelated individuals are more likely to share extended segments identical by descent (IBD) in the vicinity of the selected locus (Albrechtsen et al. 2010), compared with a population subject only to genetic drift. Consistent with this prediction, we observed an extreme excess of shared IBD across populations around  $R2d2$  (**Figure 2A**):  $R2d2$  falls in the top 0.25% of IBD-sharing scores across the autosomes. In all cases, the shared haplotype has high copy number, and this haplotype appears to have a single origin in European mice (**Supplementary Figure 1**). Strong signatures are also evident at a previously identified target of positive selection, the *Vkorc1* locus (distal Chromosome 7) (Song et al. 2011).

In principle, the strength and age of a sweep can be estimated from the extent of loss of genetic diversity around the locus under selection. From the SNP data, we identified a ~1 Mb haplotype with significantly greater identity between individuals with  $R2d2^{HC}$  alleles compared to the surrounding sequence. We used published sequencing data from 26 wild mice (Pezer et al. 2015) to measure local haplotype diversity around  $R2d2$  and found that the haplotypes associated with  $R2d2^{HC}$  alleles are longer than those associated with  $R2d2^{LC}$  (**Figure 2B-C**). This pattern of extended haplotype homozygosity is consistent with positive selection over an evolutionary timescale as short as 450 generations (see **Methods**). However, due to the extremely low rate of recombination in the vicinity of  $R2d2$  (Didion et al. 2015), this is most likely an underestimate of the true age of the mutation.

It is important to note that the excess IBD we observe at  $R2d2$  (**Figure 2A**) arises from segments shared *between* geographically distinct populations (**Figure 1**). When considering sharing *within* populations only (**Supplementary Figure 2**),



*R2d2* is no longer an outlier. Therefore, it was unsurprising that we failed to detect a sweep around *R2d2* using statistics that are designed to identify population-specific differences in selection, like hapFLK (Fariello et al. 2013), or selection in aggregate, like iHS (Voight et al. 2006) (**Supplementary Figure 3**).

### ***A selfish sweep in an outbred laboratory population***

We validated the ability of *R2d2*<sup>HC</sup> to drive a selfish sweep by examining *R2d2* allele frequencies in multiple closed-breeding laboratory populations for which we had access to samples from the founder populations. The Diversity Outbred (DO) is a randomized outbreeding population derived from eight inbred mouse strains that is maintained under conditions designed to minimize the effects of both selection and genetic drift (Svenson et al. 2012). Expected time to fixation or loss of an allele present in the founder generation (with initial frequency 1/8) is ~900 generations. The WSB/EiJ founder strain contributed an *R2d2*<sup>HC</sup> allele which underwent a more than three-fold increase (from 0.18 to 0.62) in 13 generations ( $p < 0.001$  by simulation; range 0.03 – 0.26 after 13 generations in 1000 simulation runs) (**Figure 3A**), accompanied by significantly distorted allele frequencies ( $p < 0.01$  by simulation) across a ~100 Mb region linked to the allele (**Figure 3B**).

### ***R2d2*<sup>HC</sup> has an underdominant effect on fitness**

The fate of a selfish sweep depends on the fitness costs associated with the different genotypic classes at the selfish genetic element. For example, maintenance of intermediate frequencies of the *t*-complex (Lyon 1991) and *SD* (Hartl 1973) chromosomes in natural populations of mice and *Drosophila*, respectively, is thought to result from decreased fecundity associated with those selfish elements.

To assess the fitness consequences of *R2d2*<sup>HC</sup> we treated litter size as a proxy for absolute fitness (**Figure 3C**). We determined whether each female had distorted transmission of *R2d2* using a one-sided exact binomial test for deviation from the expected Mendelian genotype frequencies in her progeny. Average litter size among DO females homozygous for *R2d2*<sup>LC</sup> (“LL” in Figure 3C: 8.1; 95% CI



7.8 – 8.3) is not different than among females homozygous for  $R2d2^{HC}$  (“HH”: 8.1; 95% CI 7.4 – 8.9) or among heterozygous females without distorted transmission of  $R2d2^{HC}$  (“LH-TRD”: 8.1; 95% CI 7.7 – 8.5). However, in the presence of meiotic drive, litter size is markedly reduced (“LH+TRD”: 6.5; 95% CI 5.9 – 7.2;  $p = 5.7 \times 10^{-5}$  for test of difference versus all other classes). The relative fitness of heterozygous females with distorted transmission is  $w = 0.81$ , for a selection coefficient of  $s = 1 - w = 0.19$  (95% CI 0.10 – 0.23) against the heterozygote. Despite this underdominant effect, the absolute number of  $R2d2^{HC}$  alleles transmitted by heterozygous females in each litter is significantly higher in the presence of meiotic drive than its absence ( $p = 0.032$ ; **Figure 3D**). The rising frequency of  $R2d2^{HC}$  in the DO thus represents a truly selfish sweep.

### ***Selfish sweeps in other laboratory populations***

We also observed selfish sweeps in selection lines derived from the ICR:Hsd outbred population (Swallow et al. 1998), in which  $R2d2^{HC}$  alleles are segregating (**Figure 4A**). Three of four lines selectively bred for high voluntary wheel-running (HR lines) and two of four control lines (10 breeding pairs per line per generation in both conditions) went from starting  $R2d2^{HC}$  frequencies  $\sim 0.75$  to fixation in 60 generations or less: two lines were fixed by generation 20, and three more by generation 60. In simulations mimicking this breeding design and neutrality (**Figure 4B**), median time to fixation was 46 generations (5th percentile: 9 generations). Although the  $R2d2^{HC}$  allele would be expected to eventually fix by drift in 6 of 8 lines given its high starting frequency, fixation in two lines within 20 generations and three more lines by 60 generations is not expected ( $p = 0.003$  by simulation). In a related advanced intercross segregating for high and low copy number alleles at  $R2d2$  (HR8xC57BL/6J (Kelly et al. 2010b)), we observed that  $R2d2^{HC}$  increased from a frequency of 0.5 to 0.85 in just 10 generations and fixed by 15 generations (**Figure 4C**), versus a median 184 generations in simulations ( $p < 0.001$ ; **Figure 4D**). The increase in  $R2d2^{HC}$  allele frequency in the DO and the advanced intercross populations occurred at least an order of magnitude faster than what is predicted by drift alone.

Using archival tissue samples, we were able to determine *R2d2* allele frequencies in the original founder populations of 6 of the ~60 wild-derived inbred strains available for laboratory use (Didion and Pardo-Manuel de Villena 2013). In four strains, WSB/EiJ, WSA/EiJ, ZALENDE/EiJ, and SPRET/EiJ, *R2d2<sup>HC</sup>* alleles were segregating in the founders and are now fixed in the inbred populations. In the other two strains, LEWES/EiJ and TIRANO/EiJ, the founders were not segregating for *R2d2* copy number and the inbred populations are fixed, as expected, for *R2d2<sup>LC</sup>* (**Supplementary Figure 4**). This trend in wild-derived strains is additional evidence of the tendency for *R2d2<sup>HC</sup>* to go to fixation in closed breeding populations when segregating in the founder individuals.

### ***On the distribution and frequency of *R2d2<sup>HC</sup>* alleles in the wild***

Considering the degree of transmission distortion in favor of *R2d2<sup>HC</sup>* (up to 95% (Didion et al. 2015)), and that *R2d2<sup>HC</sup>* repeatedly goes to fixation in laboratory populations, the moderate frequency of *R2d2<sup>HC</sup>* in the wild (0.14 worldwide, **Table 1**) is initially surprising. Neither do we find any obvious association between geography and *R2d2<sup>HC</sup>* allele frequency that might indicate the mutation's origin or its pattern of gene flow (**Table 1** and **Figure 1**).

Several observations may explain these results. First, relative to the effective size of *M. m. domesticus* (82,500-165,000 (Geraldes et al. 2011)), our sample size was small. Our sampling was also geographically sparse and non-uniform. Thus, our allele frequency estimates may differ substantially from the true population allele frequencies at *R2d2*.

Second, the reduction in litter size associated with *R2d2<sup>HC</sup>* may have a greater impact on *R2d2* allele frequency in a natural population than in the controlled laboratory populations we studied. In these breeding schemes each mating pair contributes the same number of offspring to the next generation so that most fitness differences are effectively erased.

Third, *R2d2<sup>HC</sup>* alleles may be unstable and lose the ability to drive upon reverting to low copy number. This has been reported previously (Didion et al. 2015).

Fourth, in a large population (*i.e.* in the wild) the dynamics of an underdominant meiotic drive allele are only dependent on the relationship between the degree of transmission distortion ( $m$ ) and the strength of selection against heterozygotes (Hedrick 1981) ( $s$ ). This relationship can be expressed by the quantity  $q$  (see **Methods**), for which  $q > 1$  indicates increasing probability of fixation of the driving allele,  $q < 1$  indicates increasing probability that the allele will be purged, and  $q \approx 1$  leads to maintenance of the allele at an (unstable) equilibrium frequency. The fate of the driving allele in a finite population additionally depends on the population size (Hedrick 1981): the smaller the population, the greater the likelihood that genetic drift will fix a mutation with  $q < 1$  (**Figure 5A-B**). We note that  $R2d2^{HC}$  appears to exist close to the  $q \approx 1$  boundary ( $s \approx 0.2$ ,  $m \approx 0.7$ , and thus  $q \approx 0.96$ ).

Last but not least, in contrast to many meiotic drive systems, in which the component elements are tightly linked, the action of  $R2d2^{HC}$  is dependent on unlinked modifier loci whose frequencies, modes of action, and effect sizes are unknown. It is therefore difficult to predict the effect of the modifiers on  $R2d2$  allele frequencies in the wild. We used forward-in-time simulations to explore the effect of a single unlinked modifier locus on fixation probability of a driving allele. Under an additive model ( $m = 0.80$  for modifier genotype  $AA$ ,  $0.65$  for genotype  $Aa$  and  $0.50$  for genotype  $aa$ ), fixation probability is reduced and time to fixation is increased by the presence of the modifier locus (**Figure 5C-D**). As the modifier allele becomes more rare, fixation probability approaches the neutral expectation ( $1/2N$ , where  $N$  is population size). Importantly, the driving allele tends to sweep until the modifier allele is lost, and then drifts either to fixation or loss (**Figure 5E**). Drift at modifier loci thus creates a situation akin to selection in a varying environment – one outcome of which is balancing selection (Gillespie 2010). This is consistent with the maintenance of  $R2d2^{HC}$  at intermediate frequencies in multiple populations separated by space and time, as we observe in wild mice.

## Concluding remarks

Most analyses of positive selection in the literature assume that the likelihood of a newly arising mutation becoming established, increasing in frequency and even going to fixation within a population is positively correlated with its effect on organismal fitness. Here, we have shown that a selfish genetic element has repeatedly driven sweeps in which the change in allele frequency and the effect on organismal fitness are decoupled. Our results suggest that evolutionary studies should employ independent evidence to determine whether loci implicated as drivers of selective sweeps are adaptive or selfish.

Although a selfish sweep has clear implications for such experimental populations as the DO and the Collaborative Cross (Didion et al. 2015), the larger evolutionary implications of selfish sweeps are less obvious. On the one hand, sweeps may be relatively rare, as appears to be the case for classic selective sweeps in recent human history (Hernandez et al. 2011). On the other hand, theory and comparative studies indicate that selfish genetic elements may be a potent force during speciation (White 1978; Hedrick 1981; Pardo-Manuel de Villena and Sapienza 2001; Henikoff and Malik 2002; Brandvain and Coop 2011). With the growing appreciation for the potential importance of non-Mendelian genetics in evolution, and the increasing tractability of population-scale genetic analyses, we anticipate that the effects of selfish elements such as *R2d2* in natural populations, including their contributions to events of positive selection, will soon be elucidated.

Improved understanding of the mechanism of meiotic drive at *R2d2* may also enable practical applications of selfish genetic elements. As demonstrated by the recent use of RNA-guided genome editing to develop gene drive systems in mosquitos and fruit flies (Esvelt et al. 2014; Gantz and Bier 2015; Hammond et al. 2015), experimental manipulation of chromosome segregation is now feasible. *R2d2* is an attractive option for the development of a mammalian gene drive system because, as we have shown here, it has already proven capable of driving to fixation in multiple independent genetic backgrounds. Furthermore,

there are multiple unlinked modifiers of *R2d2* that, when identified, might be exploited for fine-grained manipulation of transmission ratios.

## Materials and Methods

### *Mice*

Wild *M. m. domesticus* mice were trapped at a large number of sites across Europe and the Americas (**Figure 1A** (upper panel), and **Supplementary Table 1**). A set of 29 *M. m. castaneus* mice trapped in northern India and Taiwan (**Figure 1A**, lower panel) were included as an outgroup (Yang et al. 2011). Trapping was carried out in concordance with local laws, and either did not require approval or was carried out with the approval of the relevant regulatory bodies (depending on the locality and institution).

All Diversity Outbred (DO) mice were bred at The Jackson Laboratory. Litter sizes were counted within 24 hours of birth. Individual investigators purchased mice for unrelated studies and contributed either tissue samples or genotype data to this study (**Supplementary Table 2**).

High running (HR) selection and intercross lines were developed as previously described (Swallow et al. 1998; Kelly et al. 2010a; Leamy et al. 2012). Mouse tails were archived from 3 generations of the HR selection lines (-2, +22, and +61) and from every generation of the HR8xC57BL/6J advanced intercross.

Progenitors of wild-derived strains have various origins (see **Supplementary Methods**), and were sent to Eva M. Eicher at The Jackson Laboratory for inbreeding in the early 1980s. Frozen tissues from animals in the founder populations were maintained at The Jackson Laboratory by Muriel Davidson until 2014, when they were transferred to the Pardo-Manuel de Villena laboratory at the University of North Carolina at Chapel Hill.

All laboratory mice were handled in accordance with the IACUC protocols of the investigators' respective institutions.

## Genotyping

*Microarray genotyping and quality control:* Whole-genomic DNA was isolated from tail, liver, muscle or spleen using Qiagen Gentra Puregene or DNeasy Blood & Tissue kits according to the manufacturer's instructions. All genome-wide genotyping was performed using the Mouse Universal Genotyping Array (MUGA) and its successor, MegaMUGA (GeneSeek, Lincoln, NE) (Collaborative Cross Consortium 2012; Morgan and Welsh 2015). Genotypes were called using Illumina BeadStudio (Illumina Inc., Carlsbad, CA). We excluded all markers and all samples with missingness greater than 10%. We also computed the sum intensity for each marker:  $S_i = X_i + Y_i$ , where  $X_i$  and  $Y_i$  are the normalized hybridization intensities of the two allelic probes. We determined the expected distribution of sum intensity values using a large panel of control samples. We excluded any array for which the set of intensities  $I = \{S_1, S_2, \dots, S_n\}$  was not normally distributed or whose mean was significantly left-shifted from the reference distribution (one-tailed  $t$ -test with  $p < 0.05$ ).

*PCR genotyping:* The *R2d2* element has been mapped to a 900 kb critical region on Chromosome 2: 83,631,096 – 84,541,308 (mm9 build), referred to herein as the “candidate interval” (Didion et al. 2015). We designed primers to amplify two regions within the candidate interval. *Primer Set A* targets a 318 bp region (chr2: 83,673,604 – 83,673,921) with two distinct haplotypes in linkage with either the *R2d2<sup>LC</sup>* allele or the *R2d2<sup>HC</sup>* allele: 5'-CCAGCAGTGATGAGTTGCCATCTTG-3' (forward) and 5'-TGTCACCAAGGTTTTCTTCCAAAGGGAA-3' (reverse). *Primer Set B* amplifies a 518 bp region (chr2: 83,724,728 – 83,725,233); the amplicon is predicted, based on whole-genome sequencing, to contain a 169 bp deletion in HR8 relative to the C57BL/6J reference genome: 5'-GAGATTTGGATTTGCCATCAA-3' (forward) and 5'-GGTCTACAAGGACTAGAAACAG-3' (reverse). Primers were designed using IDT PrimerQuest (<https://www.idtdna.com/Primerquest/Home/Index>).

Crude whole-genomic DNA for PCR reactions was extracted from mouse tails. The tissues were heated in 100  $\mu$ l of 25 mM NaOH/0.2 mM EDTA at 95°C for 60



minutes followed by the addition of 100 µl of 40 mM Tris-HCl. The mixture was then centrifuged at 2000 x g for 10 minutes and the supernatant used as PCR template. PCR reactions contained 1 µL dNTPs, 0.3 µL of each primer, 5.3 µL of water, and 0.1 µL of GoTaq polymerase (Promega) in a final volume of 10 µL. Cycling conditions were 95°C, 2-5 min, 35 cycles at 95°, 55° and 72°C for 30 sec each, with a final extension at 72°C, 7 min.

For *Primer Set A*, products were sequenced at the University of North Carolina Genome Analysis Facility on an Applied Biosystems 3730XL Genetic Analyzer. Chromatograms were analyzed with the Sequencher software package (Gene Codes Corporation, Ann Arbor, Michigan, United States). For *Primer Set B*, products were visualized and scored on 2% agarose gels. Assignment to haplotypes was validated by comparing the results to qPCR assays for the single protein-coding gene within *R2d2*, *Cwc22* (see “Copy-number assays” below). For generation +61, haplotypes were assigned based on MegaMUGA genotypes and validated by the normalized per-base read depth from whole-genome sequencing (see below), calculated with samtools mpileup (Li et al. 2009). The concordance between qPCR, read depth, and haplotypes assigned by MegaMUGA or Sanger sequencing is shown in **Supplementary Figure 5**.

Assays: Wild mice were genotyped on MegaMUGA (**Supplementary Table 1**). DO mice were genotyped on MUGA and MegaMUGA (**Supplementary Table 2**). HR selection lines were genotyped at three generations, one before (-2) and two during (+22 and +61) artificial selection. We genotyped 185 randomly selected individuals from generation -2 and 157 individuals from generation +22 using *Primer Set A*. An additional 80 individuals from generation +61 were genotyped with the MegaMUGA array (see “Microarray genotyping and quality-control” below). The HR8xC57BL/6J advanced intercross line was genotyped with *Primer Set B* in tissues from breeding stock at generations 3, 5, 8, 9, 10, 11, 12, 13, 14, and 15.

**Copy-number assays and assignment of *R2d2* status.** Copy-number at *R2d2* was determined by qPCR for *Cwc22*, the single protein-coding gene in the *R2d*



repeat unit, as described in detail in (Didion et al. 2015). Briefly, we used commercially available TaqMan kits (Life Technologies assay numbers Mm00644079\_cn and Mm00053048\_cn) to measure the copy number of *Cwc22* relative to the reference genes *Tfr* (cat. no. 4458366, for target Mm00053048\_cn) or *Tert* (cat. no. 4458368, for target Mm00644079\_cn). Cycle thresholds ( $C_t$ ) were determined for each target using ABI CopyCaller v2.0 software with default settings, and relative cycle threshold was calculated as

$$\Delta C_t = C_t^{reference} - C_t^{target}$$

We normalized the  $\Delta C_t$  across batches by fitting a linear mixed model with batch and target-reference pair as random effects.

Estimation of integer diploid copy numbers  $> \sim 3$  by qPCR is infeasible without many technical and biological replicates, especially in the heterozygous state. We took advantage of *R2d2* diploid copy-number estimates from whole-genome sequencing for the inbred strains C57BL/6J (0), CAST/EiJ (2) and WSB/EiJ (66), and the (WSB/EiJxC57BL/6J) $F_1$  (33) to establish a threshold for declaring a sample “high-copy.” For each of the two TaqMan target-reference pairs we calculated the sample mean ( $\hat{\mu}$ ) and standard deviation ( $\hat{\sigma}$ ) of the normalized  $\Delta C_t$  among CAST/EiJ controls and wild *M. m. castaneus* individuals together. We designated as “high-copy” any individual with normalized  $\Delta C_t$  greater than  $\hat{\mu} + 2\hat{\sigma}$  – that is, any individual with approximately  $> 95\%$  probability of having diploid copy number  $> 2$  at *R2d2*. Individuals with high copy number and evidence of local heterozygosity (a heterozygous call at any of the 13 markers in the *R2d2* candidate interval) were declared heterozygous  $R2d2^{HC/LC}$ , and those with high copy number and no heterozygous calls in the candidate interval were declared homozygous  $R2d2^{HC/HC}$ .

#### **Exploration of population structure in wild mice.**

Scans for signatures of positive selection based on patterns of haplotype-sharing assume that individuals are unrelated. We identified pairs of related individuals using the *IBS2\** ratio (Stevens et al. 2011), defined as  $HETHET / (HOMHOM +$

*HETHET*), where *HETHET* and *HOMHOM* are the count of non-missing markers for which both individuals are heterozygous (share two alleles) and homozygous for opposite alleles (share zero alleles), respectively. Pairs with  $IBS2^* < 0.75$  were considered unrelated. Among individuals which were a member of one or more unrelated pairs, we iteratively removed one sample at a time until no related pairs remained, and additionally excluded markers with minor-allele frequency  $< 0.05$  or missingness  $> 0.10$ . The resulting dataset contains genotypes for 396 mice at 58,283 markers.

Several of our analyses required that samples be assigned to populations. Because mice in the wild breed in localized demes and disperse only over short distances (on the order of hundreds of meters) (Pocock et al. 2005), it is reasonable to delineate populations on the basis of geography. We assigned samples to populations based on the country in which they were trapped. To confirm that these population labels correspond to natural clusters we performed two exploratory analyses of population structure. First, classical multidimensional scaling (MDS) of autosomal genotypes was performed with PLINK (Purcell et al. 2007) (`--mdsplot --autosome`). The result is presented in **Figure 1B-C**, in which samples are colored by population. Second, we used TreeMix (Pickrell and Pritchard 2012) to generate a population tree allowing for gene flow using the set of unrelated individuals. Autosomal markers were first pruned to reach a set in approximate linkage equilibrium (`plink --indep 25 1`). TreeMix was run on the resulting set using the *M. m. castaneus* samples as an outgroup and allowing up to 10 gene-flow edges (`treemix -root "cas" -k 10`) (**Figure 1D**). The clustering of samples by population evident by MDS and the absence of long-branch attraction in the population tree together indicate that our choices of population labels are biologically reasonable.

**Scans for selection in wild mice.** Two complementary statistics, hapFLK (Fariello et al. 2013) and standardized iHS score (Voight et al. 2006), were used to examine wild-mouse genotypes for signatures of selection surrounding *R2d2*. The hapFLK statistic is a test of differentiation of local haplotype frequencies between hierarchically-structured populations. It can be interpreted as a

generalization of Wright's  $F_{ST}$  which exploits local LD. Its model for haplotypes is that of fastPHASE (Scheet 2006) and requires a user-specified value for the parameter  $K$ , the number of local haplotype clusters. We computed hapFLK in the set of unrelated individuals using *M. m. castaneus* samples as an outgroup for  $K = \{4, 8, 12, 16, 20, 24, 28, 32\}$  (hapflk --outgroup "cas" -k {K}) and default settings otherwise.

The iHS score (and its allele-frequency-standardized form |iHS|) is a measure of extended haplotype homozygosity on a derived haplotype relative to an ancestral one. For consistency with the hapFLK analysis, we used fastPHASE on the same genotypes over the same range of  $K$  with 10 random starts and 25 iterations of expectation-maximization (fastphase -K{K} -T10 -C25) to generate phased haplotypes. We then used selscan (Szpiech and Hernandez 2014) to compute iHS scores (selscan --ihs) and standardized the scores in 25 equally-sized bins (selscan-norm --bins 25).

Values in the upper tail of the genome-wide distribution of hapFLK or |iHS| represent candidates for regions under selection. We used percentile ranks directly and did not attempt to calculate approximate or empirical  $p$ -values.

**Detection of identity-by-descent (IBD) in wild mice.** As an alternative test for selection, we computed density of IBD-sharing using the RefinedIBD algorithm of BEAGLE v4.0 (r1399) (Browning and Browning 2013), applying it to the full set of 500 individuals. The haplotype model implemented in BEAGLE uses a tuning parameter (the "scale" parameter) to control model complexity: larger values enforce a more parsimonious model, increasing sensitivity and decreasing computational cost at the expense of accuracy. The authors recommend a value of 2.0 for ~1M SNP arrays in humans. We increased the scale parameter to 5.0 to increase detection power given (a) our much sparser marker set, and (b) the relatively weaker local LD in mouse versus human populations (Laurie et al. 2007). We trimmed one marker from the ends of candidate IBD segments to reduce edge effects (java -jar beagle.jar ibd=true ibdscale=5 ibdtrim=1). We retained those IBD segments shared between individuals in the set of 396

unrelated mice. In order to limit noise from false-positive IBD segments, we further removed segments with LOD score < 5.0 or width < 0.5 cM.

An empirical IBD-sharing score was computed in 500 kb bins with 250 kb overlap as:

$$f_n = \frac{\sum_n s_{ij} p_{ij}}{w_{ij}}$$

where the sum in the numerator is taken over all IBD segments overlapping bin  $n$  and  $s_{ij}$  is an indicator variable which takes the value 1 if individuals  $i, j$  share a haplotype IBD in bin  $n$  and 0 otherwise. The weighting factor  $w_{ij}$  is defined as

$$w_{ij} = 0.001 \times \left( \frac{n_a n_b}{W} \right)^{1/2}$$

with

$$W = \max(n_a n_b)$$

where  $n_a$  and  $n_b$  are the number of unrelated individuals in the population to which individuals  $i$  and  $j$  belong, respectively. This weighting scheme accounts for the fact that we oversample some geographic regions (for instance, Portugal and Maryland) relative to others. To explore differences in haplotype-sharing within versus between populations we introduce an additional indicator  $p_{ij}$ . Within-population sharing is computed by setting  $p_{ij} = 1$  if individuals  $i, j$  are drawn from the same population and  $p_{ij} = 0$  otherwise. Between-population sharing is computed by reversing the values of  $p_{ij}$ . The result is displayed in **Figure 2**.

**Analysis of local sequence diversity in whole-genome sequence from wild mice.** We obtained raw sequence reads for 26 unrelated wild mice (European Nucleotide Archive project accession PRJEB9450 (Pezer et al. 2015)); samples are listed in **Supplementary Table 3**. Details of the sequencing protocol are given in the indicated reference. Briefly, paired-end libraries with mean insert size 230 bp were prepared from genomic DNA using the Illumina TruSeq kit. Libraries were sequenced on the Illumina HiSeq 2000 platform with 2x100bp reads to an average coverage of 20X per sample (populations AHZ, CLG and FRA) or 12X

per sample (population HGL). We realigned the raw reads to the mouse reference genome (GRCm38/mm10 build) using BWA MEM (Li and Durban, unpublished) with default parameters. SNPs relative to the reference sequence of Chromosome 2 were called using samtools mpileup v0.1.19-44428cd with maximum per-sample depth of 200. Genotype calls with root-mean-square mapping quality < 30 or genotype quality > 20 were treated as missing. Sites were used for phasing if they had a minor-allele count  $\geq 2$  and at most 2 missing calls. BEAGLE v4.0 (r1399) was used to phase the samples conditional on each other, using 20 iterations for phasing and default settings otherwise (java -jar beagle.jar phasing-its=20). Sites were assigned a genetic position by linear interpolation on the most recent genetic map for the mouse (Liu et al. 2010; Liu et al. 2014).

The *R2d2* candidate interval spans positions 83,790,939 – 84,701,151 in the mm10 reference sequence. As the index SNP for *R2d2*<sup>HC</sup> we chose the SNP with strongest nominal association with *R2d2* copy number (as estimated by Pezer *et al.* (2015)) within 1 kb of the proximal boundary of the candidate interval. That SNP is chr2:83,790,275T>C. The C allele is associated with high copy number and is therefore presumed to be the derived allele. We computed the extended haplotype homozygosity (EHH) statistic (Sabeti et al. 2002) in the phased dataset over a 1 Mb window on each side of the index SNP using selscan (selscan --ehh --ehh-win 1000000). The result is presented in **Figure 2B**. Decay of haplotypes away from the index SNP was visualized as a bifurcation diagram (**Figure 2C**) using code adapted from the R package rehh (<https://cran.r-project.org/package=rehh>).

**Estimation of age of *R2d2*<sup>HC</sup> alleles in wild mice.** To obtain a lower bound for the age of *R2d2*<sup>HC</sup> and its associated haplotype, we used the method of Stephens *et al.* (1998) (Stephens et al. 1998). Briefly, this method approximates the probability  $P$  that a haplotype is affected by recombination or mutation during the  $G$  generations since its origin as

$$P = e^{-G(-\mu+r)}$$

where  $\mu$  and  $r$  are the per-generation rates of mutation and recombination, respectively. Assuming  $\mu \ll r$  and, taking  $P'$ , the observed number of ancestral (non-recombined) haplotypes in a sample, as an estimator of  $P$ , obtain the following expression for  $G$ :

$$G \approx -(\log P')/r$$

We enumerated haplotypes in our sample of 52 chromosomes at 3 SNPs spanning the *R2d2* candidate interval. The most proximal SNP is the index SNP for the EHH analyses (chr2:83,790,275T>C); the most distal SNP is the SNP most associated with copy number within 1 kbp of the boundary of the candidate interval (chr2:84,668,280T>C); and the middle SNP was randomly-chosen to fall approximately halfway between (chr2:84,079,970C>T). The three SNPs span genetic distance 0.154 cM (corresponding to  $r = 0.00154$ ). The most common haplotype among samples with high copy number according to Pezer et al. (2015) was assumed to be ancestral. Among 52 chromosomes, 22 carried at least part of the *R2d2*<sup>HC</sup>-associated haplotype; of those, 11 were ancestral and 11 recombinant (**Supplementary Table 3**). This gives an estimated age of 450 generations for *R2d2*<sup>HC</sup>.

We note that the approximations underlying this model assume constant population size and neutrality. To the extent that haplotype homozygosity decays more slowly on a positively- (or selfishly-) selected haplotype, we will underestimate the true age of *R2d2*<sup>HC</sup>.

**Inference of local phylogeny at R2d2.** To determine whether the *R2d2*<sup>HC</sup> haplotype(s) shared among wild mice have a single origin, we constructed a phylogenetic tree from the 39 MegaMUGA SNPs in the region flanking *R2d2* (Chromosome 2: 82 – 85 Mb). We first excluded individuals heterozygous in the region and then constructed a matrix of pairwise distances from the proportion of alleles shared identical-by-state (IBS) between samples. A tree was inferred from the distance matrix using the neighbor-joining method implemented in the R package ape (<http://cran.r-project.org/package=ape>).

**Haplotype frequency estimation in the Diversity Outbred.** We inferred the



haplotypes of DO individuals using probabilistic methods (Liu et al. 2010; Liu et al. 2014). We combined the haplotypes of DO individuals genotyped in this study with the Generation 8 individuals in Didion *et al.* (2015). As an additional QC step, we computed the number of historical recombination breakpoints per individual per generation (Svenson et al. 2012) and removed outliers (more than 1.5 standard deviations from the mean). We also excluded related individuals based on the distribution of haplotype sharing between related and unrelated individuals computed from simulations (mean  $0.588 \pm 0.045$  for first-degree relatives; mean  $0.395 \pm 0.039$  for second-degree relatives; and mean  $0.229 \pm 0.022$  for unrelated individuals; see **Supplementary Methods**). Finally, we computed in each generation the frequency of each founder haplotype at 250 kb intervals surrounding the *R2d2* region (Chromosome 2: 78-86 Mb), and identified the greatest WSB/EiJ haplotype frequency.

**Analyses of fitness effects of *R2d2*<sup>HC</sup> in the Diversity Outbred.** To assess the consequences of *R2d2*<sup>HC</sup> for organismal fitness, we treated litter size as a proxy for absolute fitness. Using breeding data from 475 females from DO generations 13, 16, 18 and 19, we estimated mean litter size in four genotype groups: females homozygous *R2d2*<sup>LC/LC</sup>; females heterozygous *R2d2*<sup>HC/LC</sup> with transmission ratio distortion (TRD) in favor of the *R2d2*<sup>HC</sup> allele; females heterozygous *R2d2*<sup>HC/LC</sup> without TRD; and females homozygous *R2d2*<sup>HC/HC</sup>. The 126 heterozygous females were originally reported in Didion et al. (2015). Group means were estimated using a linear mixed model with parity and genotype as fixed effects and a random effect for each female using the lme4 package for R. Confidence intervals were obtained by likelihood profiling and post-hoc comparisons were performed via *F*-tests, using the Kenward-Roger approximation for the effective degrees of freedom. The mean number of *R2d2*<sup>HC</sup> alleles transmitted per litter by heterozygous females with and without TRD was estimated from data in Didion et al. (2015) with a weighted linear model, using the total number of offspring per female as weights. Litter sizes are presented in **Supplementary Table 2**, and estimates of group mean litter sizes in **Figure 3C**.



**Whole-genome sequencing of HR selection lines.** Ten individuals from generation +61 of each of the eight HR selection lines were subject to whole-genome sequencing. Briefly, high-molecular-weight genomic DNA was extracted using a standard phenol/chloroform procedure. Illumina TruSeq libraries were constructed using 0.5 µg starting material, with fragment sizes between 300 and 500 bp. Each library was sequenced on one lane of an Illumina HiSeq2000 flow cell in a single 2x100bp paired-end run.

**Null simulations of closed breeding populations.** Widespread fixation of alleles due to drift is expected in small, closed populations such as the HR lines or the HR8xC57BL/6J advanced intercross line. But even in these scenarios, an allele under positive selection is expected to fix 1) more often than expected by drift alone in repeated breeding experiments using the same genetic backgrounds, and 2) more rapidly than expected by drift alone. We used the R package *simcross* (<https://github.com/kbroman/simcross>) to obtain the null distribution of fixation times and fixation probabilities for an HR line under Mendelian transmission.

We assume that the artificial selection applied for voluntary exercise in the HR lines (described in Swallow *et al.* (1998)) was independent of *R2d2* genotype. This assumption is justified for two reasons. First, 3 of 4 selection lines and 2 of 4 control (unselected) lines fixed *R2d2<sup>HC</sup>*. Second, at the fourth and tenth generation of the HR8xC57BL/6J advanced intercross, no quantitative trait loci (QTL) associated with the selection criteria (total distance run on days 5 and 6 of a 6-day trial) were found on Chromosome 2. QTL for peak and average running speed were identified at positions linked to *R2d2*; however, HR8 alleles at those QTL were associated with decreased, not increased, running speed (Kelly *et al.* 2010a; Leamy *et al.* 2012).

Without artificial selection an HR line reduces to an advanced intercross line maintained by avoidance of sibling mating. We therefore simulated 100 replicates of an advanced intercross with 10 breeding pairs and initial focal allele frequency 0.75. Trajectories were followed until the focal allele was fixed or lost. As a

validation we confirmed that the focal allele was fixed in 754 of 1000 runs, not different from the expected 750 ( $p = 0.62$ , binomial test). Simulated trajectories and the distribution of sojourn times are presented in **Figure 4B**.

The HR8xC57BL/6J advanced intercross line was simulated as a standard biparental AIL with initial focal allele frequency of 0.5. Again, 1000 replicates of an AIL with 20 breeding pairs were simulated and trajectories were followed until the focal allele was fixed or lost. The result is presented in **Figure 4D**.

**Investigation of population dynamics of meiotic drive.** We used two approaches to investigate the population dynamics of a female-limited meiotic drive system with selection against the heterozygote. First, we evaluated the fixation probability of a driving allele in relationship to transmission ratio ( $m$ ), selection coefficient against the heterozygote ( $s$ ) and population size ( $N$ ) by modeling the population as a discrete-time Markov chain whose states are possible counts of the driving allele. Define  $p_{t+1}$  to be the expected frequency of the driving allele in generation  $t+1$  given its frequency in the previous generation ( $p_t$ ). Following Hedrick et al. (1981), the expression for  $p_{t+1}$  is

$$p_{t+1} = \frac{(1-s)(1+2m)p_t(1-p_t) + 2(1-p_t)^2}{2[1-2sp_t(1-p_t)]}$$

In an infinite population, the equilibrium behavior of the system is governed by the quantity  $q$ :

$$q = \frac{1}{2}(1-s)(1+2m)$$

When  $q > 1$ , the driving allele always increases in frequency. For values of  $q \approx 1$  and smaller, the driving allele is either lost or reaches an unstable equilibrium frequency determined  $m$  and  $s$ .

Let  $M$  be the matrix of transition probabilities for the Markov chain with  $2N+1$  states corresponding to possible counts of the driving allele in the population (0, ...  $2N$ ). The entries  $m_{ij}$  of  $M$  are

$$m_{ij} = \binom{2N}{i} (1-p_{t+1})^{2N-i} (p_{t+1})^i$$

677 Given a vector  $p_0$  of starting probabilities, the probability distribution at generation  
678  $t$  is obtained by iteration:

$$p_t = p_0 M^t$$

679 We initiated the chain with a single copy of the driving allele (*i.e.*  $p_0[1] = 1$ ).  
680 Since this Markov chain has absorbing states (namely allele counts 0 and  $2N$ ),  
681 we approximated steady-state probabilities by iterating the chain until the change  
682 in probabilities between successive generations was  $< 10^{-4}$ . Fixation probability is  
683 given by the value of the entry  $p_t[2N]$  at convergence. We evaluated all possible  
684 combinations of  $0.5 \leq m \leq 1.0$  (in steps of 0.1) and  $0 \leq s \leq 0.3$  (in steps of 0.05).

685 To investigate the effects of modifier loci on the frequency trajectory of a driving  
686 allele we used forward-in-time simulations under a Wright-Fisher model with  
687 selection, implemented in Python. Simulations assumed a constant population  
688 size of  $2N = 200$  chromosomes, each 100 cM long, with balanced sex ratio. At  
689 the beginning of each run a driving allele was introduced (at 50 cM) on a single,  
690 randomly chosen chromosome. Modifier alleles were introduced into the  
691 population independently at a specified frequency, at position 0.5 cM (*ie.*  
692 unlinked to the driving allele). To draw the next generation, an equal number of  
693 male and female parents were selected (with replacement) from the previous  
694 generation according to their fitness. Among females heterozygous for the driving  
695 allele, transmission ratio ( $m$ ) was calculated according to genotype at the  
696 modifier loci (if any). For males and homozygous females,  $m = 0.5$ . Individuals  
697 were assigned a relative fitness of 1 if  $m = 0.5$  and 0.8 if  $m > 0.5$ . Recombination  
698 was simulated under the Haldane model (*i.e.* a Poisson process along  
699 chromosomes with no crossover interference). Finally, for each individual in the  
700 next generation, one chromosome was randomly chosen from each parent with  
701 probability  $m$ .

702 Simulation runs were restarted when the driving allele was fixed or lost, until 100  
703 fixation events were observed in each condition of interest. Probability of fixation  
704 was estimated using the waiting time before each fixation event, assuming a

geometric distribution of waiting times, using the `fitdistr()` function in the R package MASS. Simulations are summarized in **Figure 5**.

Simulation code is available on GitHub: <https://github.com/andrewparkermorgan/r2d2-selfish-sweep>.

## References

- Albrechtsen A, Moltke I, Nielsen R. 2010. Natural selection and the distribution of identity-by-descent in the human genome. *Genetics* 186:295–308.
- Babcock CS, Anderson WW. 1996. Molecular evolution of the Sex-Ratio inversion complex in *Drosophila pseudoobscura*: analysis of the Esterase-5 gene region. *Mol Biol Evol.* 13:297–308.
- Bersaglieri T, Sabeti PC, Patterson N, Vanderploeg T, Schaffner SF, Drake JA, Rhodes M, Reich DE, Hirschhorn JN. 2004. Genetic signatures of strong recent positive selection at the lactase gene. *Am J Hum Genet.* 74:1111–1120.
- Brandvain Y, Coop G. 2011. Scrambling eggs: meiotic drive and the evolution of female recombination rates. *Genetics* 190:709–723.
- Browning BL, Browning SR. 2013. Improving the accuracy and efficiency of identity-by-descent detection in population data. *Genetics* 194:459–471.
- Bryk J, Tautz D. 2014. Copy number variants and selective sweeps in natural populations of the house mouse (*Mus musculus domesticus*). *Front Genet.* 5:153.
- Collaborative Cross Consortium. 2012. The genome architecture of the Collaborative Cross mouse genetic reference population. *Genetics* 190:389–401.
- Colonna V, Ayub Q, Chen Y, Pagani L, Luisi P, Pybus M, Garrison E, Xue Y, Tyler-Smith C. 2014. Human genomic regions with exceptionally high levels of population differentiation identified from 911 whole-genome sequences. *Genome Biol.* 15:R88.
- Derome N, Baudry E, Ogereau D, Veuille M, Montchamp-Moreau C. 2008. Selective sweeps in a 2-locus model for sex-ratio meiotic drive in *Drosophila simulans*. *Mol Biol Evol.* 25:409–416.
- Derome N, Métayer K, Montchamp-Moreau C, Veuille M. 2004. Signature of selective sweep associated with the evolution of sex-ratio drive in *Drosophila simulans*. *Genetics* 166:1357–1366.

- 739 Didion JP, Morgan AP, Clayshulte AM-F, McMullan RC, Yadgary L, Petkov PM,  
740 Bell TA, Gatti DM, Crowley JJ, Hua K, et al. 2015. A multi-megabase copy  
741 number gain causes maternal transmission ratio distortion on mouse  
742 chromosome 2. PLoS Genet. 11:e1004850.
- 743 Didion JP, Pardo-Manuel de Villena F. 2013. Deconstructing *Mus gemischus*:  
744 advances in understanding ancestry, structure, and variation in the genome  
745 of the laboratory mouse. Mamm. Genome 24:1–20.
- 746 Dyer KA, Charlesworth B, Jaenike J. 2007. Chromosome-wide linkage  
747 disequilibrium as a consequence of meiotic drive. P Natl Acad Sci USA  
748 104:1587–1592.
- 749 Esvelt KM, Smidler AL, Catteruccia F, Church GM, Tautz D. 2014. Concerning  
750 RNA-guided gene drives for the alteration of wild populations. eLife Sciences  
751 3:e03401.
- 752 Eversley CD, Clark T, Xie Y, Steigerwalt J, Bell TA, de Villena FP, Threadgill  
753 DW. 2010. Genetic mapping and developmental timing of transmission ratio  
754 distortion in a mouse interspecific backcross. BMC Genet. 11:98.
- 755 Fariello MI, Boitard S, Naya H, SanCristobal M, Servin B. 2013. Detecting  
756 signatures of selection through haplotype differentiation among hierarchically  
757 structured populations. Genetics 193:929–941.
- 758 Fishman L, Saunders A. 2008. Centromere-associated female meiotic drive  
759 entails male fitness costs in monkeyflowers. Science 322:1559–1562.
- 760 Fu W, Akey JM. 2013. Selection and adaptation in the human genome. Annu  
761 Rev Genomics Hum Genet. 14:467–489.
- 762 Gantz VM, Bier E. 2015. The mutagenic chain reaction: a method for converting  
763 heterozygous to homozygous mutations. Science 348:442–444.
- 764 Geraldès A, Basset P, Smith KL, Nachman MW. 2011. Higher differentiation  
765 among subspecies of the house mouse (*Mus musculus*) in genomic regions  
766 with low recombination. Mol Ecol. 20:4722–4736.
- 767 Gillespie JH. 2010. Population genetics: a concise guide. 2nd ed. Baltimore: JHU  
768 Press.
- 769 Grossman SR, Andersen KG, Shlyakhter I, Tabrizi S, Winnicki S, Yen A, Park  
770 DJ, Griesemer D, Karlsson EK, Wong SH, et al. 2013. Identifying recent  
771 adaptations in large-scale genomic data. Cell 152:703–713.
- 772 Hammond A, Galizi R, Kyrou K, Simoni A, Siniscalchi C, Katsanos D, Gribble M,  
773 Baker D, Marois E, Russell S, et al. 2015. A CRISPR-Cas9 gene drive  
774 system targeting female reproduction in the malaria mosquito vector

775        *Anopheles gambiae*. Nat Biotechnol. online ahead of print.

776        Hartl DL. 1973. Complementation analysis of male fertility among the segregation  
777        distorter chromosomes of *Drosophila melanogaster*. Genetics 73:613–629.

778        Hedrick PW. 1981. The establishment of chromosomal variants. Evolution  
779        35:322–332.

780        Henikoff S, Malik HS. 2002. Centromeres: selfish drivers. Nature 417:227–227.

781        Hernandez RD, Kelley JL, Elyashiv E, Melton SC, Auton A, McVean GAT, 1000  
782        Genomes Project Consortium, Sella G, Przeworski M. 2011. Classic selective  
783        sweeps were rare in recent human evolution. Science 331:920–924.

784        Kaplan NL, Hudson RR, Langley CH. 1989. The “hitchhiking effect” revisited.  
785        Genetics 123:887–899.

786        Kelly SA, Nehrenberg DL, Peirce JL, Hua K, Steffy BM, Wiltshire T, Pardo-  
787        Manuel de Villena F, Garland T, Pomp D. 2010a. Genetic architecture of  
788        voluntary exercise in an advanced intercross line of mice. Physiol. Genomics  
789        42:190–200.

790        Kelly SA, Nehrenberg DL, Hua K, Gordon RR, Garland T, Pomp D. 2010b.  
791        Parent-of-origin effects on voluntary exercise levels and body composition in  
792        mice. Physiol. Genomics 40:111–120.

793        Kingan SB, Garrigan D, Hartl DL. 2010. Recurrent selection on the Winters sex-  
794        ratio genes in *Drosophila simulans*. Genetics 184:253–265.

795        Laurie CC, Nickerson DA, Anderson AD, Weir BS, Livingston RJ, Dean MD,  
796        Smith KL, Schadt EE, Nachman MW. 2007. Linkage disequilibrium in wild  
797        mice. PLoS Genet. 3:e144.

798        Leamy LJ, Kelly SA, Hua K, Pomp D. 2012. Exercise and diet affect quantitative  
799        trait loci for body weight and composition traits in an advanced intercross  
800        population of mice. Physiol. Genomics 44:1141–1153.

801        Li H, Handsaker B, Wysoker A, Fennell T, Ruan J, Homer N, Marth G, Abecasis  
802        G, Durbin R, 1000 Genome Project Data Processing Subgroup. 2009. The  
803        Sequence Alignment/Map format and SAMtools. Bioinformatics 25:2078–  
804        2079.

805        Liu EY, Morgan AP, Chesler EJ, Wang W, Churchill GA, Pardo-Manuel de  
806        Villena F. 2014. High-resolution sex-specific linkage maps of the mouse  
807        reveal polarized distribution of crossovers in male germline. Genetics  
808        197:91–106.

809        Liu EY, Zhang Q, McMillan L, Pardo-Manuel de Villena F, Wang W. 2010.



- 810 Efficient genome ancestry inference in complex pedigrees with inbreeding.  
811 Bioinformatics 26:i199–i207.
- 812 Lyon MF. 1991. The genetic basis of transmission-ratio distortion and male  
813 sterility due to the *t* complex. The American Naturalist 137:349–358.
- 814 Maynard Smith J, Haigh J. 1974. The hitch-hiking effect of a favourable gene.  
815 Genet Res. 23:23–35.
- 816 Montagutelli X, Turner R, Nadeau JH. 1996. Epistatic control of non-Mendelian  
817 inheritance in mouse interspecific crosses. Genetics 143:1739–1752.
- 818 Morgan AP, Fu C-P, Kao C-Y, Welsh CE, Didion JP, Yadgary L, Hyacinth L,  
819 Ferris MT, Bell TA, Miller DR, et al. 2015. The Mouse Universal Genotyping  
820 Array: From Substrains to Subspecies. G3 online ahead of print.
- 821 Morgan AP, Welsh CE. 2015. Informatics resources for the Collaborative Cross  
822 and related mouse populations. Mamm. Genome 26:521–539.
- 823 Nolte V, Pandey RV, Kofler R, Schlötterer C. 2013. Genome-wide patterns of  
824 natural variation reveal strong selective sweeps and ongoing genomic conflict  
825 in *Drosophila mauritiana*. Genome Res. 23:99–110.
- 826 Pardo-Manuel de Villena F, Sapienza C. 2001. Female meiosis drives karyotypic  
827 evolution in mammals. Genetics 159:1179–1189.
- 828 Pardo-Manuel de Villena F. 2004. Evolution of the mammalian karyotype. In:  
829 Ruvinsky A, Graves JAM, editors. Mammalian Genomics. Cambridge (MA):  
830 CABI Publishing. p. 317–348.
- 831 Pelz H-J, Rost S, Hünnerberg M, Fregin A, Heiberg A-C, Baert K, MacNicol AD,  
832 Prescott CV, Walker A-S, Oldenburg J, et al. 2005. The genetic basis of  
833 resistance to anticoagulants in rodents. Genetics 170:1839–1847.
- 834 Pezer Ž, Harr B, Teschke M, Babiker H, Tautz D. 2015. Divergence patterns of  
835 genic copy number variation in natural populations of the house mouse (*Mus*  
836 *musculus domesticus*) reveal three conserved genes with major population-  
837 specific expansions. Genome Res. 25:1114–1124.
- 838 Pickrell JK, Pritchard JK. 2012. Inference of population splits and mixtures from  
839 genome-wide allele frequency data. PLoS Genet. 8:e1002967.
- 840 Pocock M, Hauffe HC, Searle JB. 2005. Dispersal in house mice. Bio J Linn Soc.  
841 84:565–583.
- 842 Presgraves DC, Gérard PR, Cherukuri A, Lyttle TW. 2009. Large-scale selective  
843 sweep among segregation distorter chromosomes in African populations of  
844 *Drosophila melanogaster*. PLoS Genet. 5:e1000463.



- 845 Purcell S, Neale B, Todd-Brown K, Thomas L, Ferreira MA, Bender D, Maller J,  
846 Sklar P, de Bakker PI, Daly MJ, et al. 2007. PLINK: a tool set for whole-  
847 genome association and population-based linkage analyses. *Am J Hum*  
848 *Genet.* 81:559–575.
- 849 Rogala AR, Morgan AP, Christensen AM, Gooch TJ, Bell TA, Miller DR, Godfrey  
850 VL, Pardo-Manuel de Villena F. 2014. The Collaborative Cross as a resource  
851 for modeling human disease: CC011/Unc, a new mouse model for  
852 spontaneous colitis. *Mamm. Genome* 25:95–108.
- 853 Sabeti PC, Reich DE, Higgins JM, Levine HZP, Richter DJ, Schaffner SF, Gabriel  
854 SB, Platko JV, Patterson NJ, McDonald GJ, et al. 2002. Detecting recent  
855 positive selection in the human genome from haplotype structure. *Nature*  
856 419:832–837.
- 857 Sandler L, Novitski E. 1957. Meiotic drive as an evolutionary force. *American*  
858 *Naturalist* 91:105–110.
- 859 Scheet P. 2006. A fast and flexible statistical model for large-scale population  
860 genotype data: applications to inferring missing genotypes and haplotypic  
861 phase. *Am J Hum Genet.* 78:629–644.
- 862 Siracusa LD, Alvord WG, Bickmore WA, Jenkins NA, Copeland NG. 1991.  
863 Interspecific backcross mice show sex-specific differences in allelic  
864 inheritance. *Genetics* 128:813–821.
- 865 Song Y, Endepols S, Klemann N, Richter D, Matuschka F-R, Shih C-H, Nachman  
866 MW, Kohn MH. 2011. Adaptive introgression of anticoagulant rodent poison  
867 resistance by hybridization between old world mice. *Curr Biol.* 21:1296–1301.
- 868 Staubach F, Lorenc A, Messer PW, Tang K, Petrov DA, Tautz D. 2012. Genome  
869 patterns of selection and introgression of haplotypes in natural populations of  
870 the house mouse (*Mus musculus*). *PLoS Genet* 8:e1002891.
- 871 Stephens JC, Reich DE, Goldstein DB, Shin HD, Smith MW, Carrington M,  
872 Winkler C, Huttley GA, Allikmets R, Schriml L, et al. 1998. Dating the origin of  
873 the CCR5-Delta32 AIDS-resistance allele by the coalescence of haplotypes.  
874 *Am J Hum Genet.* 62:1507–1515.
- 875 Stevens EL, Heckenberg G, Roberson EDO, Baugher JD, Downey TJ, Pevsner  
876 J. 2011. Inference of relationships in population data using identity-by-  
877 descent and identity-by-state. *PLoS Genet.* 7:e1002287.
- 878 Svenson KL, Gatti DM, Valdar W, Welsh CE, Cheng R, Chesler EJ, Palmer AA,  
879 McMillan L, Churchill GA. 2012. High-resolution genetic mapping using the  
880 Mouse Diversity outbred population. *Genetics* 190:437–447.
- 881 Swallow JG, Carter PA, Garland T Jr. 1998. Artificial selection for increased

- 882 wheel-running behavior in house mice. *Behavior Genetics* 28:227–237.
- 883 Szpiech ZA, Hernandez RD. 2014. selscan: an efficient multithreaded program to  
884 perform EHH-based scans for positive selection. *Mol Biol Evol.* 31:2824–  
885 2827.
- 886 Voight BF, Kudaravalli S, Wen X, Pritchard JK. 2006. A map of recent positive  
887 selection in the human genome. *PLoS Biol* 4:e72.
- 888 White MJD. 1978. *Modes of Speciation*. 1st ed. San Francisco: W.H.Freeman &  
889 Co Ltd.
- 890 Williamson SH, Hubisz MJ, Clark AG, Payseur BA, Bustamante CD, Nielsen R.  
891 2007. Localizing recent adaptive evolution in the human genome. *PLoS*  
892 *Genet.* 3:e90.
- 893 Yang H, Wang JR, Didion JP, Buus RJ, Bell TA, Welsh CE, bonhomme F, Yu  
894 AH-T, Nachman MW, Piálek J, et al. 2011. Subspecific origin and haplotype  
895 diversity in the laboratory mouse. *Nat Genet.* 43:648–655.

## Acknowledgements

We wish to thank all the scientists and research personnel who collected and processed the samples used in this study. In particular we acknowledge Luanne Peters and Alex Hong-Tsen Yu for providing critical samples; Ryan Buus and T. Justin Gooch for isolating DNA for high-density genotyping of wild-caught mice; and Vicki Cappa, A. Cerveira, Daniel Förster, Guila Ganem, Ron and Annabelle Leshner, K. Saïd, Toni Schelts, Dan Small, and J. Tapisso for aiding in mouse trapping. We thank Muriel Davisson at the Jackson Laboratory for maintaining, for several decades, tissue samples from breeding colonies used to generate wild-derived inbred strains. We also thank Francis Collins, Jim Evans, Matthew Hahn, and Corbin Jones for comments on an earlier version of this manuscript. This work was supported by the National Institutes of Health T32GM067553 to JPD and APM, F30MH103925 to APM, P50GM076468 to EJC, GAC, and FPMV, K01MH094406 to JJC, DK-076050 and DK-056350 to DP, AG038070 to GAC, and the intramural research program to BR and SPR; National Science Foundation IOS-1121273 to TG; Vaadia-BARD Postdoctoral Fellowship Award FI-478-13 to LY; U.S. Army Medical Research and Materiel Command W81XWH-11-1-0762 to CJB; The Jackson Laboratory new investigator funds to EJC; The National Center for Scientific Research, France to JBD (This is contribution n°ISEM 2016-002); the University of Rome “La Sapienza” to RC and ES; Claraz-Stiftung to AL; Natural Environment Research Council (UK) to MDG, HCH and JBS; EU Human Capital and Mobility Programme (CHRX-CT93-0192) to HCH and JBS; Foundation for Science and Technology, Portugal PTDC/BIA-EVF/116884/2010 and UID/AMB/50017/2013 to SIG, MLM and JBS; Spanish “Ministerio de Ciencia y Tecnología” CGL2007-62111 and “Ministerio de Economía y Competitividad” CGL2010-15243 to JV; and the Oliver Smithies Investigator funds provided by the School of Medicine at University of North Carolina to FPMV.

## Author Contributions

JPD, GAC and FPMV conceived the study. JBD, CJB, KJC, RC, Y-HC, AJC, JJC, EJC, JEF, SIG, DMG, TG, EBG-A, MDG, SAG, IG, AH, HCH, JSH, JMH, KH, WJJ, AKL, MJL-F, GM, MM, LM, MGR, BR, SPR, JBS, MSS, ES, KLS, PT-L, DWT, JVQ, GMW, DP, GAC, and FPMV provided biological samples and/or unpublished data sets. APM, LY, TAB, RCM, and LOdS conducted experiments. JPD, APM, and LY analyzed the data. JPD, APM, and FPMV wrote the paper.

## Author Information

All data is made available at <http://csbio.unc.edu/r2d2/>. The authors declare no competing financial interests. Correspondence and requests for materials should be addressed to FPMV ([fernando@med.unc.edu](mailto:fernando@med.unc.edu)).

## Figure Legends

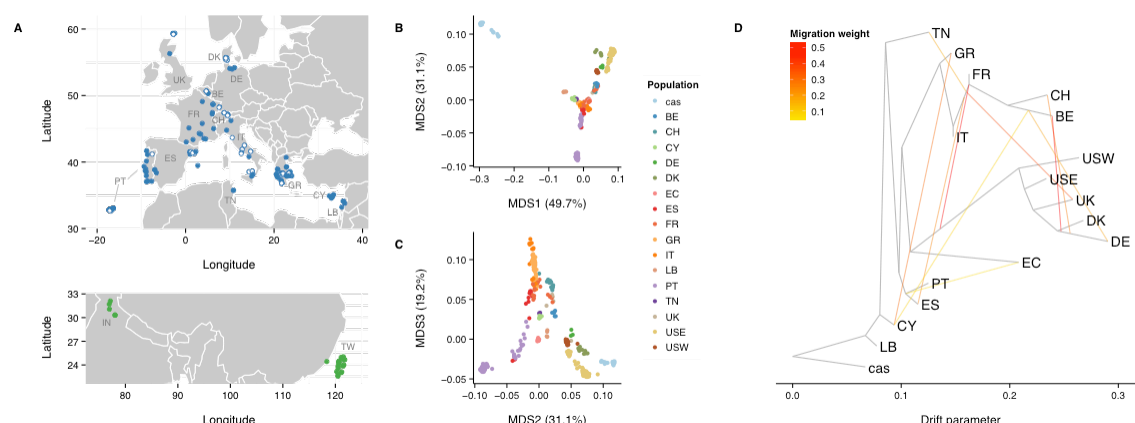

**Figure 1. Wild mouse populations used in this study.** (A) Geographic distribution of samples used in this study. Samples are colored by taxonomic origin: blue for *M. m. domesticus*, green for *M. m. castaneus*. Those with standard karyotype ( $2n = 40$ ) are indicated by closed circles; samples with Robertsonian fusion karyotypes ( $2n < 40$ ) are indicated by open circles. Populations from Floreana Island (Galapagos Islands, Ecuador; “EC”), Farallon Island (off the coast of San Francisco, California, United States; “USW”), and Maryland, United States (“USE”) are not shown. (B,C) Multidimensional scaling (MDS) ( $k = 3$  dimensions) reveals population stratification consistent with geography. *M. m. domesticus* populations are labeled by country of origin. Outgroup samples of *M. m. castaneus* origin are combined into a single cluster (“cas”). (D) Population graph estimated from autosomal allele frequencies by TreeMix. Black edges indicate ancestry, while red edges indicate gene flow by migration or admixture. Topography of the population graph is consistent with MDS result and with the geographic origins of the samples.

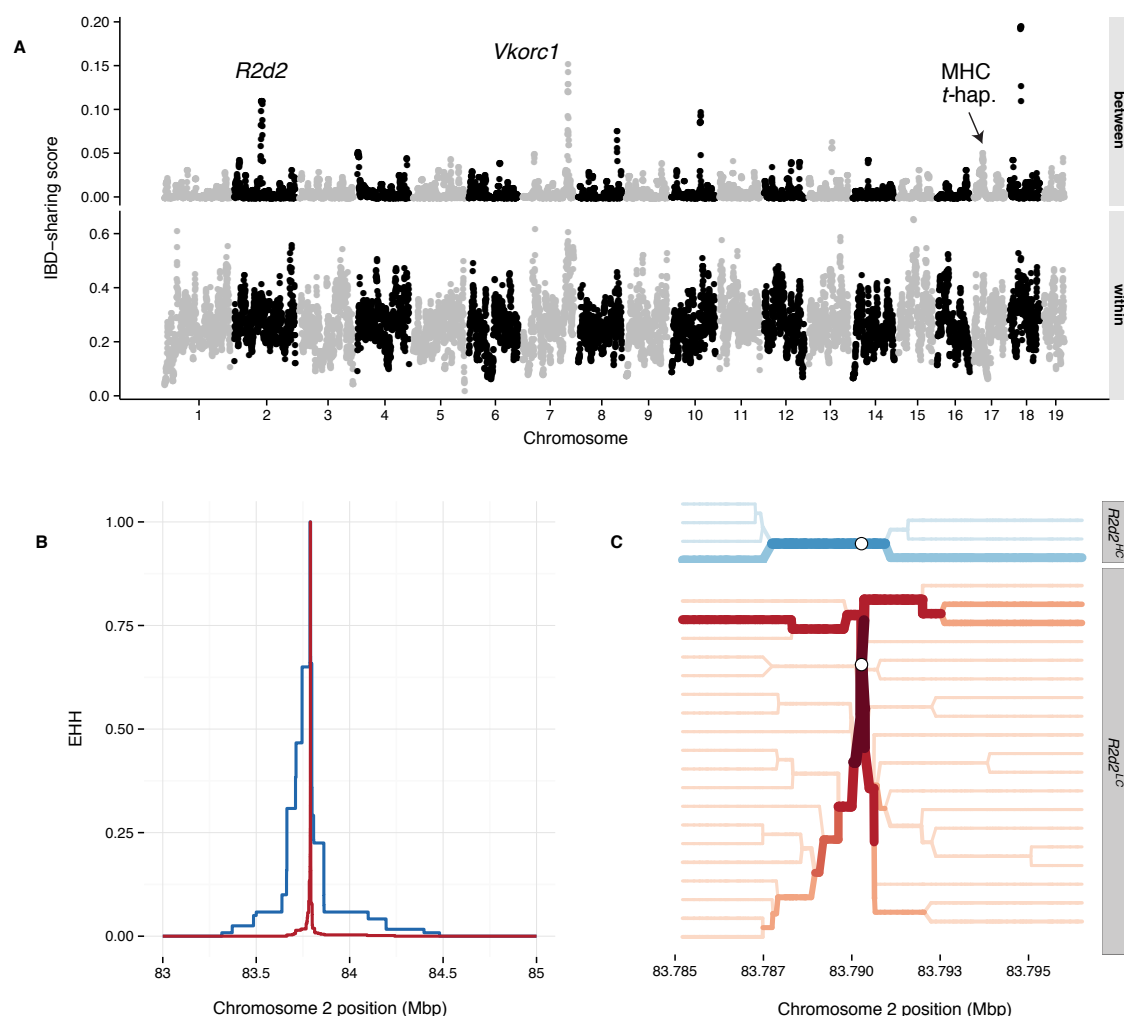

**Figure 2. Haplotype-sharing at *R2d2* provides evidence of a selective sweep in wild mice of European origin.** (A) Weighted haplotype-sharing score (see **Online Methods**), computed in 500 kb bins across autosomes, when those individuals are drawn from the same population (lower panel) or different populations (upper panel). Peaks of interest overlay *R2d2* (Chromosome 2; see **Supplementary Figure 2** for zoomed-in view) and *Vkorc1* (distal Chromosome 7). The position of the closely linked *t*-haplotype and MHC loci is also marked. (B) Decay of extended haplotype homozygosity (EHH) (Sabeti et al. 2002) on the *R2d2*<sup>HC</sup>-associated (blue) versus the *R2d2*<sup>LC</sup>-associated (red) haplotype. EHH is measured outward from the index SNP at chr2:83,790,275 and is bounded between 0 and 1. (C) Haplotype bifurcation diagrams for the *R2d2*<sup>HC</sup> (top panel, red) and *R2d2*<sup>LC</sup> (bottom panel, blue) haplotypes at the index SNP (open circle).

967 Darker colors and thicker lines indicate higher haplotype frequencies. Haplotypes  
968 extend 100 sites in each direction from the index SNP.

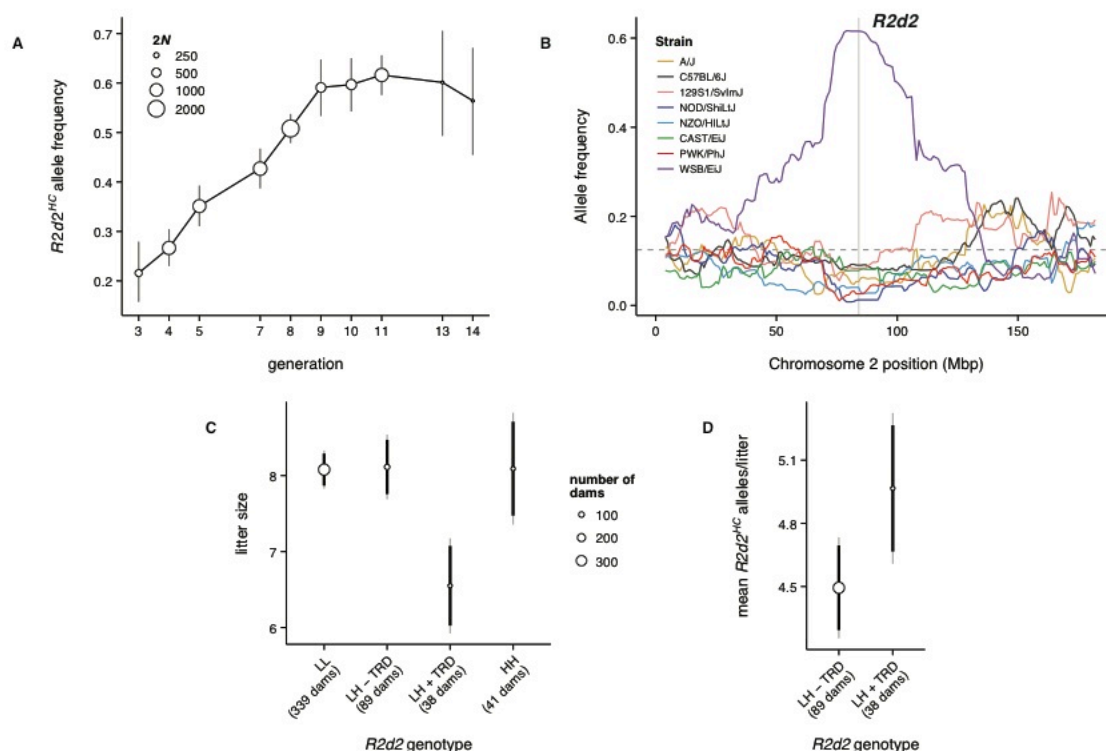

969

970 **Figure 3. An  $R2d2^{HC}$  allele rises to high frequency despite negative effect**  
971 **on litter size in the DO. (A)**  $R2d2$  drives three-fold increase in WSB/EiJ allele  
972 frequency in 13 generations in the DO population. Circle sizes reflect number of  
973 chromosomes genotyped ( $2N$ ); error bars are  $\pm 2$  SE. **(B)** Allele frequencies  
974 across Chromosome 2 (averaged in 1 Mb bins) at generation 13 of the DO,  
975 classified by founder strain. Grey shaded region is the candidate interval for  
976  $R2d2$ . **(C)** Mean litter size among DO females according to  $R2d2$  genotype: LL,  
977  $R2d2^{LC/LC}$ ; LH - TRD,  $R2d2^{LC/HC}$  without transmission ratio distortion; LH + TRD,  
978  $R2d2^{LC/HC}$  with transmission ratio distortion; HH,  $R2d2^{HC/HC}$ . Circle sizes reflect  
979 number of females tested; error bars are 95% confidence intervals from a linear  
980 mixed model which accounts for parity and repeated measures on the same  
981 female (see **Methods**.) **(D)** Mean absolute number of  $R2d2^{HC}$  alleles transmitted  
982 in each litter by heterozygous females with (LL + TRD) or without (LL - TRD)



983 transmission ratio distortion. LL + TRD females transmit more  $R2d2^{HC}$  alleles  
984 despite their significantly reduced litter size.

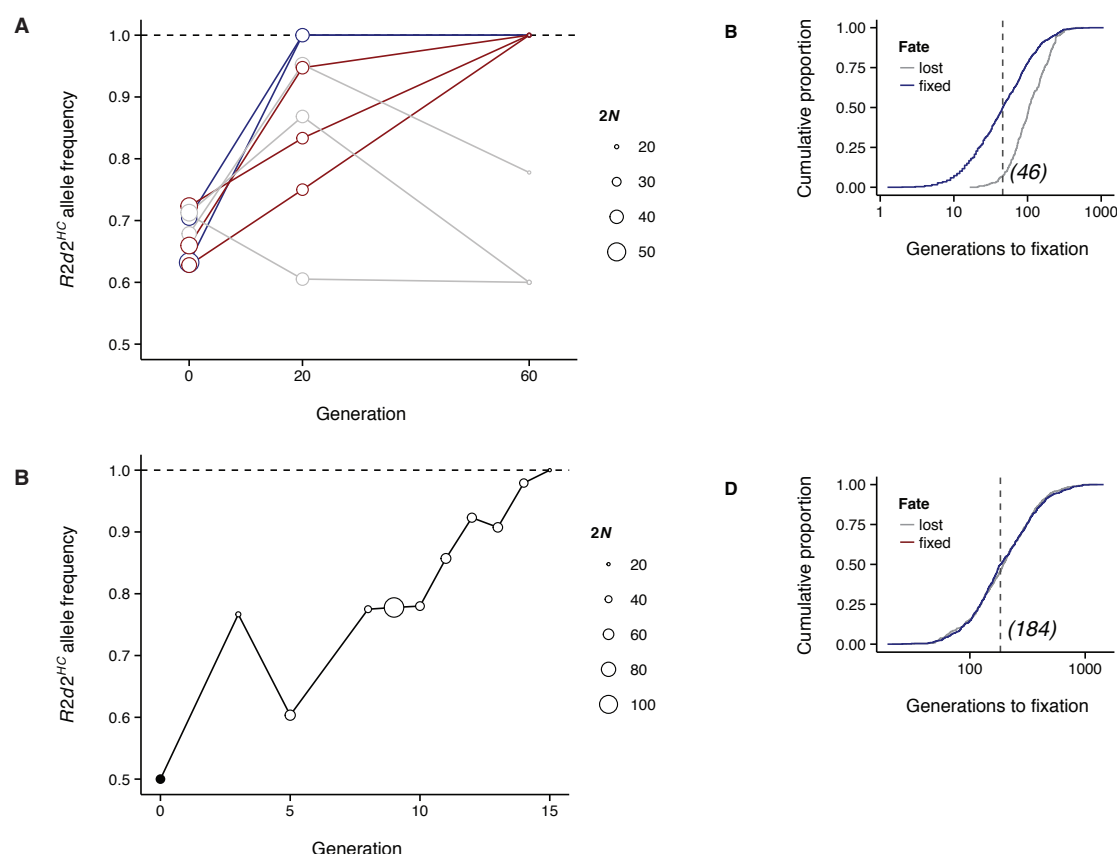

985

986 **Figure 4.  $R2d2^{HC}$  alleles rapidly increase in frequency in ICR:Hsd-derived**  
987 **laboratory populations. (A)  $R2d2^{HC}$  allele frequency during breeding of 4 HR**  
988 **selection lines and 4 control lines. Trajectories are colored by their fate: blue,**  
989  **$R2d2^{HC}$  fixed by generation 20; red.  $R2d2^{HC}$  fixed by generation 60; grey,  $R2d2^{HC}$**   
990 **not fixed. Circle sizes reflect number of chromosomes ( $2N$ ) genotyped. (B)**  
991 **Cumulative distribution of time to fixation (blue) or loss (grey) of the focal allele in**  
992 **1,000 simulations of an intercross line mimicking the HR breeding scheme.**  
993 **Dotted line indicates median fixation time. (C)  $R2d2^{HC}$  allele frequency during**  
994 **breeding of an (HR8xC57BL/6J) advanced intercross line. Circle sizes reflect**  
995 **number of chromosomes ( $2N$ ) genotyped. (D) Cumulative distribution of time to**  
996 **fixation (blue) or loss (grey) of the focal allele in 1,000 simulations of an**

997 advanced intercross line mimicking the HR8xC57BL/6J AIL. Dotted line indicates  
998 median fixation time.

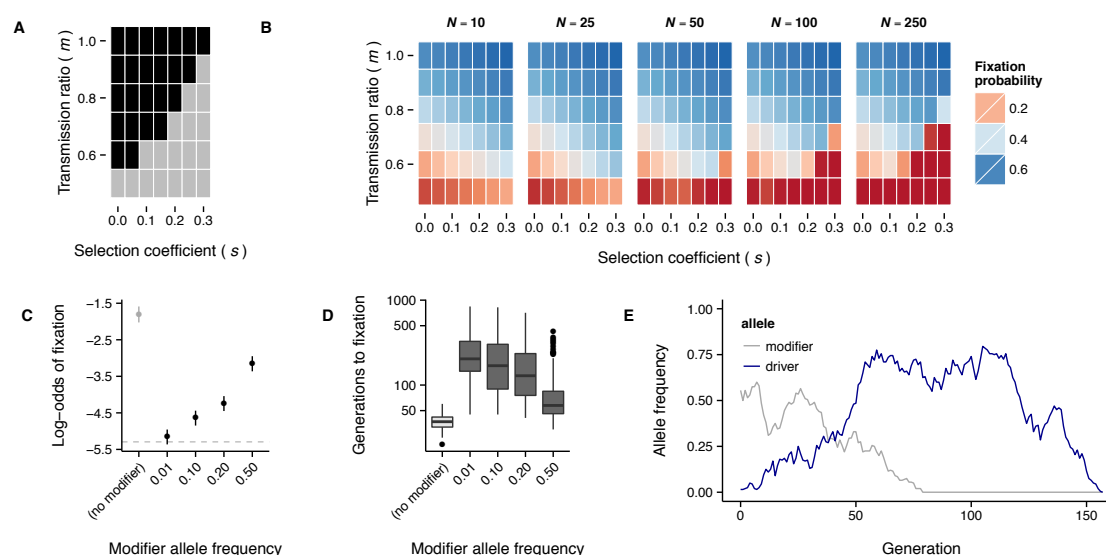

999

1000 **Figure 5. Population dynamics of a meiotic drive allele. (A)** Phase diagram  
1001 for a meiotic drive system like *R2d2*, with respect to transmission ratio ( $m$ ) and  
1002 selection coefficient against the heterozygote ( $s$ ). Regions of the parameter  
1003 space for which there is directional selection for the driving allele are shown in  
1004 black; regions in which there are unstable equilibria or directional selection  
1005 against the driving allele are shown in grey. **(B)** Probability of fixing the driving  
1006 allele as a function of  $m$ ,  $s$  and population size ( $N$ ). Notice that, in the area  
1007 corresponding to the grey region of panel A, fixation probability declines rapidly  
1008 as population size increases. **(C)** Probability of fixing the driving allele in  
1009 simulations of meiotic drive dependent on a single modifier locus ( $N = 100$ ,  $s =$   
1010  $0.2$ , maximum  $m = 0.8$ , initial driver frequency  $1/2N$ ). Estimates are given  $\pm 2$   
1011 SE. Grey dashed line corresponds to fixation probability for a neutral allele  
1012 ( $1/2N$ ). **(D)** Time to fixation of the driving allele. Values represent 100 fixation  
1013 events in each condition. **(E)** Example allele-frequency trajectories from a  
1014 “collapsed” selfish sweep: while the modifier allele is present at intermediate  
1015 frequency, the driving allele sweeps to a frequency of  $\sim 0.75$ . After the modifier  
1016 allele is lost, the driver drifts out of the population as well.

1017 **Table 1. *R2d2<sup>HC</sup>* allele frequencies in wild *M. m. domesticus* populations.**

1018 **Table 1.  $R2d2^{HC}$  allele frequencies in wild *M. m. domesticus* populations.**

| Population | R2d2HC Allele Freq | 2 x (Number of Individuals) |
|------------|--------------------|-----------------------------|
| BE         | 0.50               | 6                           |
| CH         | 0.32               | 28                          |
| CY         | 0.00               | 14                          |
| DE         | 0.67               | 6                           |
| DK         | 0.06               | 18                          |
| EC         | 0.00               | 24                          |
| ES         | 0.22               | 18                          |
| FR         | 0.15               | 26                          |
| GR         | 0.08               | 106                         |
| IT         | 0.09               | 34                          |
| LB         | 0.25               | 8                           |
| PT         | 0.13               | 54                          |
| TN         | 0.00               | 4                           |
| UK         | 0.00               | 6                           |
| USE        | 0.21               | 102                         |
| USW        | 0.00               | 24                          |

1019
